# Supplementary material
Source: Springer Nature journal article supplement (https://www.springermedizin.de/resource/supplementary/12936_2007_401_MOESM2_ESM.pdf/9547738)

**N= 3.5%(868)**

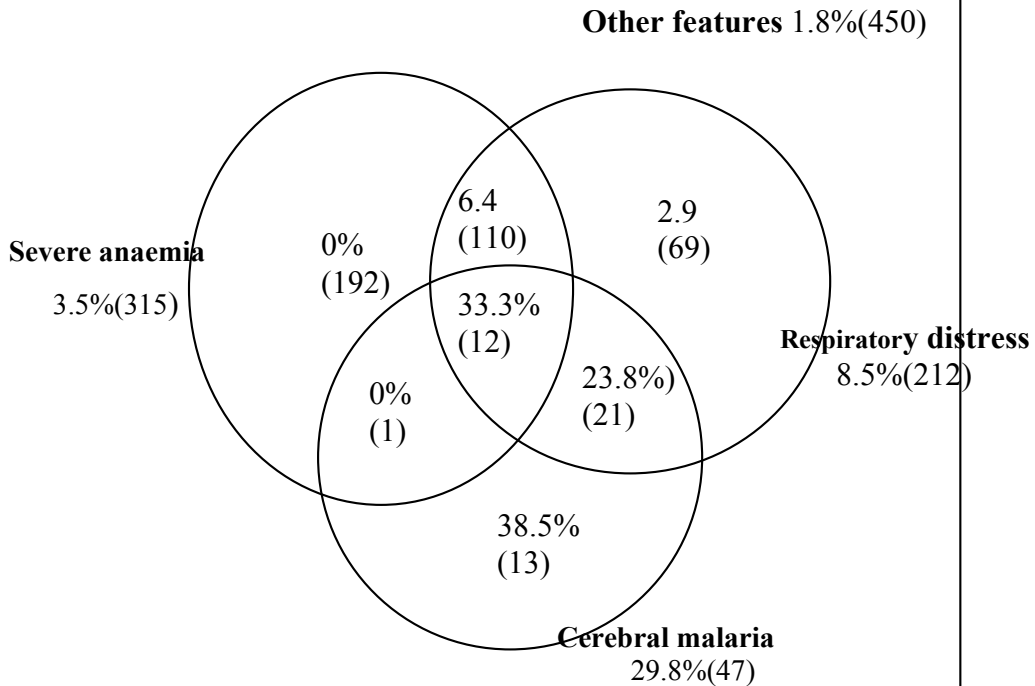

Supplement: MOESM2 [file 9547738]
